# Supplementary material for: Half-sandwich type rhodium(iii)–aminohydroxamate complexes: the role of the position of the amino group in metal ion binding
Source: Royal Society of Chemistry journal article supplement (doi:10.1039/c7nj04711h), 2018-01-01
Supplement: c7nj04711h6.pdf [file c7nj04711h6.pdf]

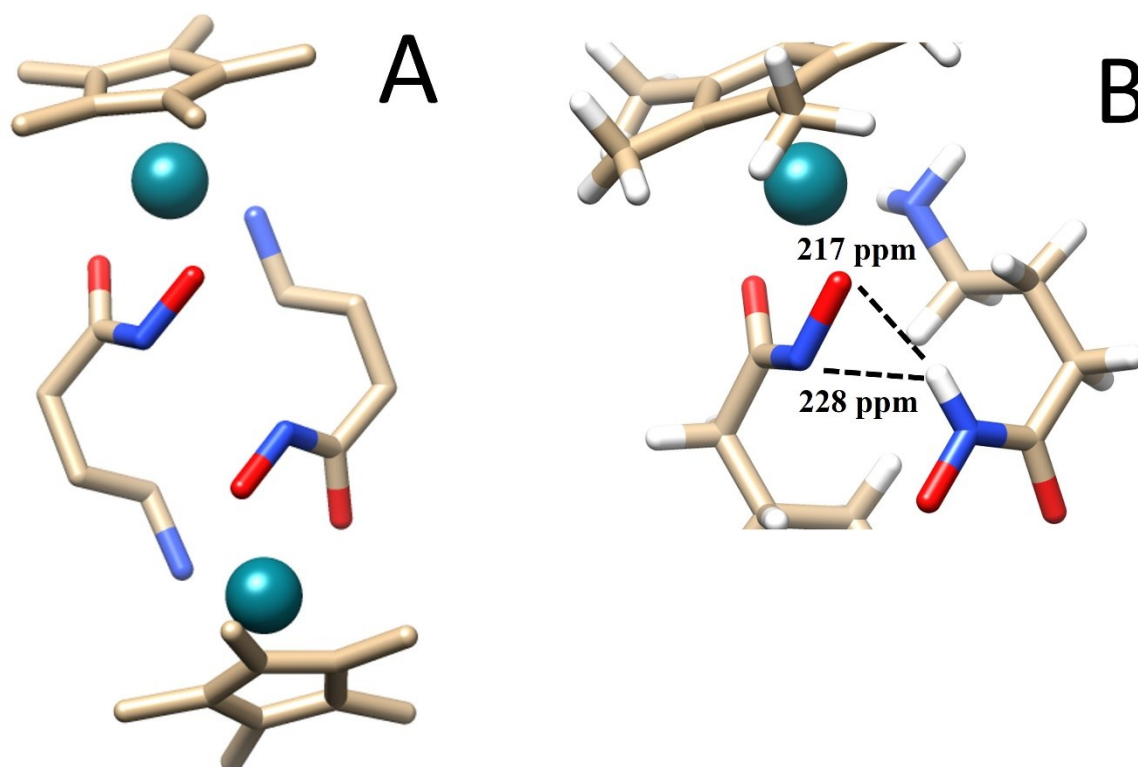

**Figure S6.** DFT optimized structure of the  $[M_2H_{-1}L_2]^+$  complex formed in the  $[(\eta^5\text{-Cp}^*)\text{Rh}(\text{H}_2\text{O})_3]^{2+}$ - $\gamma$ -abhaH system (A) together with the hydrogen bond marked by the calculated  $\text{N}(\text{H})\cdots\text{O}$  and  $\text{N}(\text{H})\cdots\text{N}$  distances (B). All of the calculations were performed using B3P86/GEN level of theory.
